# Supplementary material for: Clonal origins and parallel evolution of regionally synchronous colorectal adenoma and carcinoma
Source: PubMed Central journal article supplement (PMC4695021; doi:10.18632/oncotarget.4834), 2015-08-07
Supplement: oncotarget-06-27725-s001.pdf [file oncotarget-06-27725-s001.pdf]

SUPPLEMENTARY FIGURES AND TABLES

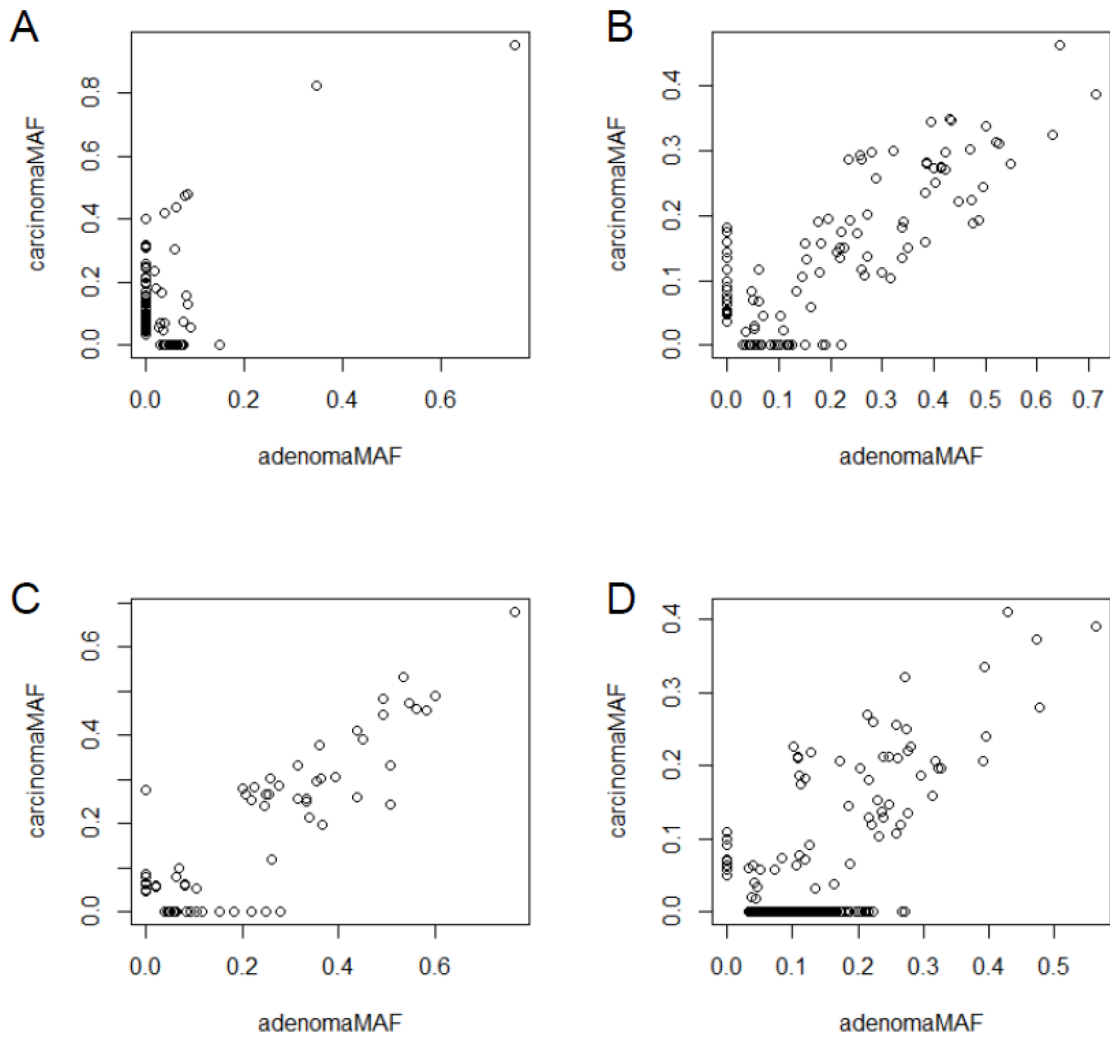

Supplementary Figure S1: Clonal analyses using mutational abundance in regionally synchronous colorectal lesions in MSS genomes. A–D. MAF plots of MSS1-4 genomes.

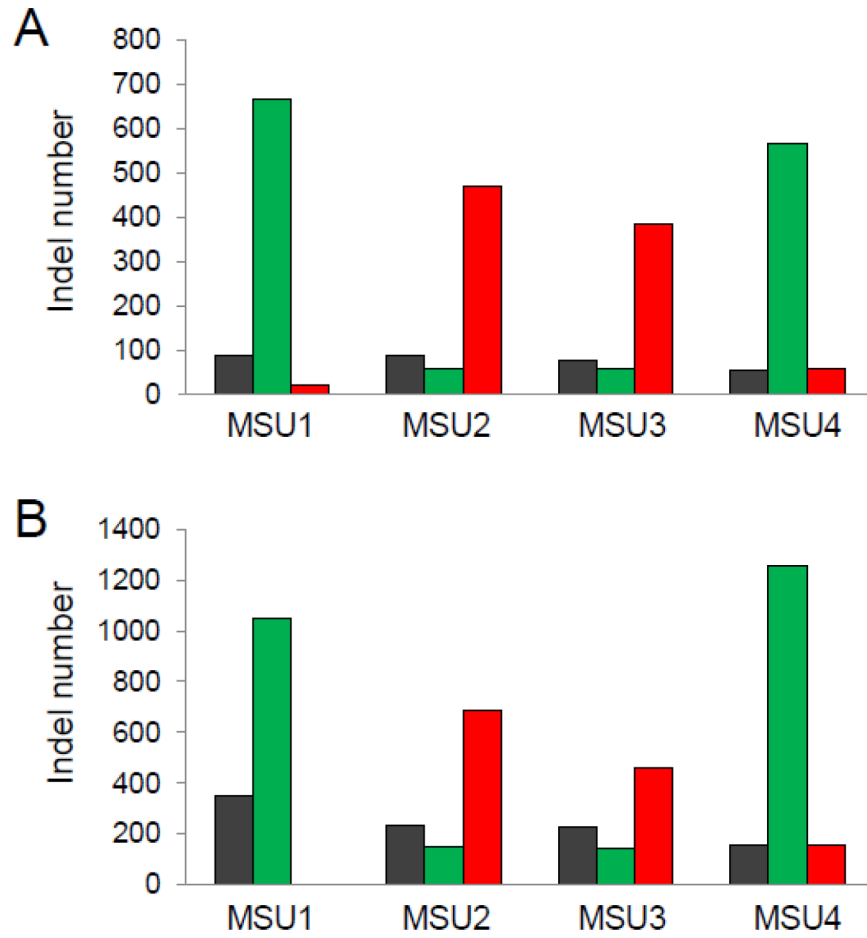

**Supplementary Figure S2: The abundance of high-confident indels.** **A.** For four microsatellite-unstable genomes, the number of indels that were identified in the regions  $> X50$  are shown. **B.** The indels whose  $MAF > 0.4$  are shown.

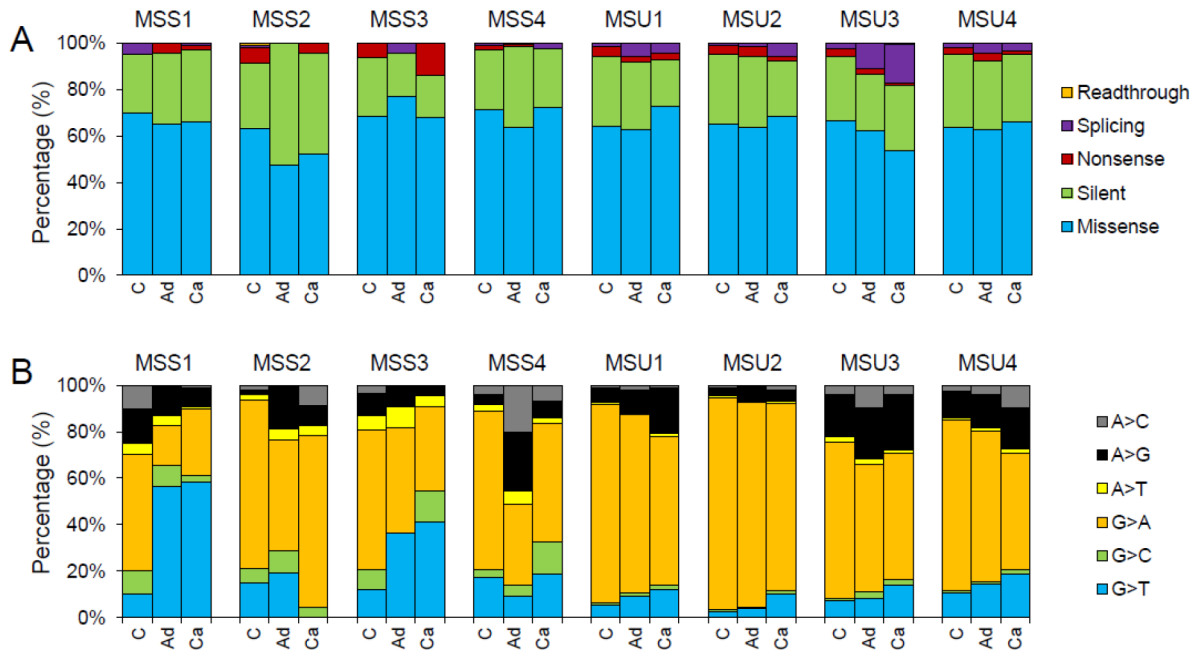

**Supplementary Figure S3: Relative fraction of SNV.** A. The percentage (%) of functional annotations of SNVs are shown. For each case, Clonal (C) and adenoma-/carcinoma-specific (Ad and Ca, respectively) mutations are separately shown. B. The six mutational spectra is shown similarly.

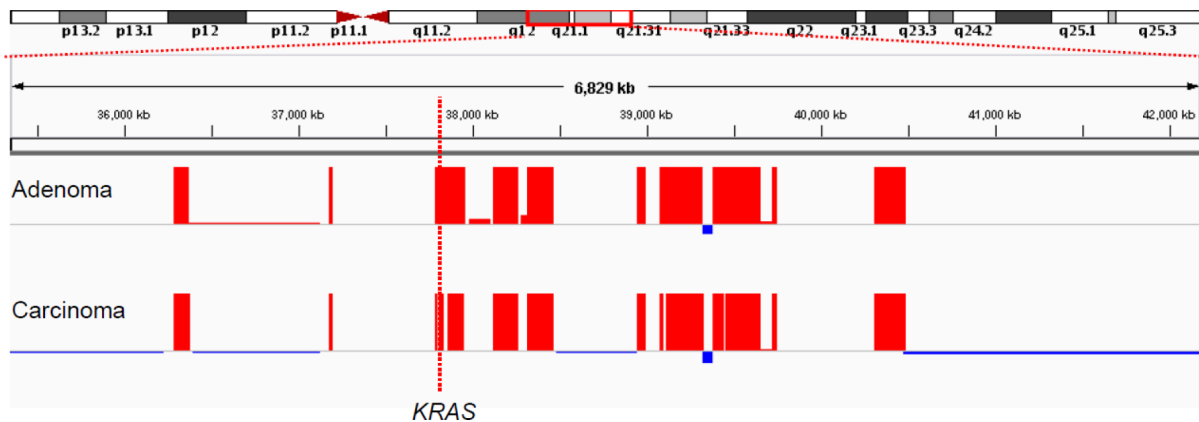

**Supplementary Figure S4: Chromothripsis event associated with ERBB2 amplification.** The copy number profiles of MSS1 is shown (above and below for the adenoma and carcinoma, respectively). The fragmented amplifications (red) are the evidence of chromothripsis. The KRAS locus is indicated with a dotted red line.

### Supplementary Table S1: Somatic variants identified across eight synchronous pairs of colorectal high-grade adenomas and carcinomas

### Supplementary Table S2: The description of whole-exome sequencing data

| Samples* | Sequencing reads** | Mapped (%)         | Coverage (mean) | Coverage (median) | % of bases ( $\geq 20$ reads) |
|----------|--------------------|--------------------|-----------------|-------------------|-------------------------------|
| MSS1 (A) | 57,784,167         | 56,345,144 (97.5%) | 75.23           | 58                | 87.9%                         |
| MSS1 (N) | 49,020,155         | 47,911,643 (97.7%) | 62.32           | 50                | 86.8%                         |
| MSS1 (T) | 49,557,224         | 48,228,107 (97.3%) | 63.01           | 47                | 85.1%                         |
| MSS2 (A) | 59,340,417         | 58,127,361 (98.0%) | 77.71           | 59                | 88.0%                         |
| MSS2 (N) | 54,066,095         | 53,262,471 (98.5%) | 67.93           | 52                | 86.1%                         |
| MSS2 (T) | 61,682,598         | 60,780,464 (98.5%) | 76.98           | 59                | 87.7%                         |
| MSS3 (A) | 55,793,629         | 55,069,829 (98.7%) | 70.75           | 53                | 86.5%                         |
| MSS3 (N) | 64,126,205         | 63,217,888 (98.6%) | 80.11           | 62                | 87.7%                         |
| MSS3 (T) | 50,531,627         | 49,870,718 (98.7%) | 65.74           | 49                | 85.9%                         |
| MSS4 (A) | 60,264,017         | 59,003,103 (97.9%) | 79.12           | 61                | 88.4%                         |
| MSS4 (N) | 53,478,185         | 52,704,181 (98.6%) | 67.1            | 52                | 86.0%                         |
| MSS4 (T) | 52,982,350         | 51,814,748 (97.8%) | 66.81           | 51                | 86.0%                         |
| MSU1 (A) | 63,672,071         | 62,276,937 (97.8%) | 84.43           | 65                | 88.6%                         |
| MSU1 (N) | 57,072,682         | 55,699,333 (97.6%) | 75.65           | 59                | 88.3%                         |
| MSU1 (T) | 39,002,391         | 38,679,069 (99.2%) | 48.2            | 36                | 77.7%                         |
| MSU2 (A) | 54,997,283         | 53,772,725 (97.8%) | 71.4            | 55                | 87.4%                         |
| MSU2 (N) | 38,637,740         | 38,302,285 (99.1%) | 48              | 36                | 77.8%                         |
| MSU2 (T) | 59,004,527         | 58,153,461 (98.6%) | 73.71           | 56                | 87.6%                         |
| MSU3 (A) | 49,425,859         | 46,938,027 (95.0%) | 63.91           | 49                | 85.5%                         |
| MSU3 (N) | 39,747,075         | 39,398,455 (99.1%) | 48.42           | 36                | 78.0%                         |
| MSU3 (T) | 59,592,919         | 58,037,982 (97.4%) | 76.71           | 60                | 88.4%                         |
| MSU4 (A) | 57,031,271         | 56,226,677 (98.6%) | 72.77           | 56                | 87.9%                         |
| MSU4 (N) | 61,520,152         | 60,650,785 (98.6%) | 79.71           | 61                | 88.4%                         |
| MSU4 (T) | 58,162,505         | 55,904,859 (96.1%) | 71.61           | 55                | 85.8%                         |

\*The synchronous adenoma (A) and tumor (T) are discriminated with matched normal genome (N). Eight cases are annotated according to the status of microsatellite instability, e.g., four microsatellite stable (MSS1-4) and four microsatellite-unstable genomes (MSU1-4).

\*\*The mean and median coverage as well as the % of bases ( $\geq 20$  reads) were calculated onto the targeted regions (Agilent SureSelect 50 Mb exon).
